# Supplementary material for: Children and adults minimise activated muscle volume by selecting gait parameters that balance gross mechanical power and work demands
Source: Oxford University Press journal article supplement (doi:10.1242/jeb.122135), 2015-09-01
Supplement: jeb122135supp.pdf [file jeb122135supp.pdf]

**Table S1.**

[Click here to Download Table S1](#)

**Table S2. Sample sizes for data shown in Figs 3 and 4.**

|                      | $\hat{p}$ : | 0.3-0.4 | 0.4-0.5 | 0.5-0.6 | 0.6-0.7 | 0.7-0.8 | 0.8-0.9 | 0.9-1.0 |
|----------------------|-------------|---------|---------|---------|---------|---------|---------|---------|
| Adult subjects       |             | 3       | 5       | 5       | 5       | 4       | 5       | 3       |
| Adult walking trials |             | 33      | 39      | 32      | 22      | 10      | 19      | 12      |
| Large child subjects |             | 8       | 7       | 6       | 6       | 5       | 4       | 3       |
| Large child trials   |             | 22      | 36      | 41      | 35      | 18      | 22      | 6       |
| Small child subjects |             | 8       | 6       | 7       | 5       | 2       | 1       | 1       |
| Small child trials   |             | 21      | 23      | 15      | 11      | 2       | 2       | 2       |

Large and small children are separated by having leg lengths longer or shorter than 0.39 m. Large children ( $N=9$ ) ranged in age from 2.5 to 4.7 years; small children ( $N=9$ ) from 1.1 to 2.7 years.
