# Supplementary material for: Children and adults minimise activated muscle volume by selecting gait parameters that balance gross mechanical power and work demands
Source: Oxford University Press journal article supplement (doi:10.1242/jeb.122135), 2015-09-01
Supplement: jeb122135va.pdf [file jeb122135va.pdf]

Hubel, T.Y. and Usherwood, J.R. (2015).  
Children and adults minimize activated muscle  
volume by selecting gait parameters that  
balance gross mechanical power and work  
demands. *J. Exp. Biol.* doi: 10.1242/jeb.122135

PLAY VIDEO

**wellcome**trust

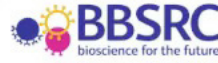

Video Absrtact
